# Supplementary material for: New Chlorinated 2,5-Diketopiperazines from Marine-Derived Bacteria Isolated from Sediments of the Eastern Mediterranean Sea
Source: PubMed Central journal article supplement (PMC7181205; doi:10.3390/molecules25071509), 2020-03-26
Supplement: molecules-25-01509-s001.pdf [file molecules-25-01509-s001.pdf]

**Supplementary Materials for**

**New Chlorinated 2,5-Diketopiperazines from Marine-Derived Bacteria Isolated from Sediments of the Eastern Mediterranean Sea**

**Maria Harizani <sup>1</sup>, Eleni Katsini <sup>1</sup>, Panagiota Georgantea <sup>1</sup>, Vassilios Roussis <sup>1</sup> and Efstathia Ioannou <sup>1,\*</sup>**

<sup>1</sup> Section of Pharmacognosy and Chemistry of Natural Products, Department of Pharmacy, School of Health Sciences, National and Kapodistrian University of Athens, Panepistimiopolis Zografou, Athens 15771, Greece; mariachariz@pharm.uoa.gr (M.H.); ekatsini@pharm.uoa.gr (E.K.); ggeorgantea@yahoo.gr (P.G.); roussis@pharm.uoa.gr (V.R.)

\* Correspondence: eioannou@pharm.uoa.gr; Tel.: +30 210 727 4913

## Table of Contents

|                                                                                                                                                                                            |     |
|--------------------------------------------------------------------------------------------------------------------------------------------------------------------------------------------|-----|
| <b>Figure S1.</b> <sup>1</sup> H NMR spectrum of <i>cis</i> -cyclo(Pro-3-chloro-Tyr) ( <b>15</b> ) in CDCl <sub>3</sub> .                                                                  | S3  |
| <b>Figure S2.</b> HSQC spectrum of <i>cis</i> -cyclo(Pro-3-chloro-Tyr) ( <b>15</b> ) in CDCl <sub>3</sub> .                                                                                | S3  |
| <b>Figure S3.</b> HMBC spectrum of <i>cis</i> -cyclo(Pro-3-chloro-Tyr) ( <b>15</b> ) in CDCl <sub>3</sub> .                                                                                | S4  |
| <b>Figure S4.</b> COSY spectrum of <i>cis</i> -cyclo(Pro-3-chloro-Tyr) ( <b>15</b> ) in CDCl <sub>3</sub> .                                                                                | S4  |
| <b>Figure S5.</b> NOESY spectrum of <i>cis</i> -cyclo(Pro-3-chloro-Tyr) ( <b>15</b> ) in CDCl <sub>3</sub> .                                                                               | S5  |
| <b>Figure S6.</b> HRESIMS spectrum of <i>cis</i> -cyclo(Pro-3-chloro-Tyr) ( <b>15</b> ).                                                                                                   | S5  |
| <b>Figure S7.</b> <sup>1</sup> H NMR spectrum of <i>trans</i> -cyclo(Pro-3-chloro-Tyr) ( <b>16</b> ) in CDCl <sub>3</sub> .                                                                | S6  |
| <b>Figure S8.</b> HSQC spectrum of <i>trans</i> -cyclo(Pro-3-chloro-Tyr) ( <b>16</b> ) in CDCl <sub>3</sub> .                                                                              | S6  |
| <b>Figure S9.</b> HMBC spectrum of <i>trans</i> -cyclo(Pro-3-chloro-Tyr) ( <b>16</b> ) in CDCl <sub>3</sub> .                                                                              | S7  |
| <b>Figure S10.</b> COSY spectrum of <i>trans</i> -cyclo(Pro-3-chloro-Tyr) ( <b>16</b> ) in CDCl <sub>3</sub> .                                                                             | S7  |
| <b>Figure S11.</b> NOESY spectrum of <i>trans</i> -cyclo(Pro-3-chloro-Tyr) ( <b>16</b> ) in CDCl <sub>3</sub> .                                                                            | S8  |
| <b>Figure S12.</b> HRESIMS spectrum of <i>trans</i> -cyclo(Pro-3-chloro-Tyr) ( <b>16</b> ).                                                                                                | S8  |
| <b>Figure S13.</b> <sup>1</sup> H NMR spectrum of the 1:1 mixture of <i>cis</i> -cyclo(Tyr-Ile) ( <b>30</b> ) and <i>cis</i> -cyclo(3-chloro-Tyr-Ile) ( <b>31</b> ) in CDCl <sub>3</sub> . | S9  |
| <b>Figure S14.</b> HSQC spectrum of the 1:1 mixture of <i>cis</i> -cyclo(Tyr-Ile) ( <b>30</b> ) and <i>cis</i> -cyclo(3-chloro-Tyr-Ile) ( <b>31</b> ) in CDCl <sub>3</sub> .               | S9  |
| <b>Figure S15.</b> HMBC spectrum of the 1:1 mixture of <i>cis</i> -cyclo(Tyr-Ile) ( <b>30</b> ) and <i>cis</i> -cyclo(3-chloro-Tyr-Ile) ( <b>31</b> ) in CDCl <sub>3</sub> .               | S10 |
| <b>Figure S16.</b> COSY spectrum of the 1:1 mixture of <i>cis</i> -cyclo(Tyr-Ile) ( <b>30</b> ) and <i>cis</i> -cyclo(3-chloro-Tyr-Ile) ( <b>31</b> ) in CDCl <sub>3</sub> .               | S10 |
| <b>Figure S17.</b> EIMS spectrum of <i>cis</i> -cyclo(3-chloro-Tyr-Ile) ( <b>31</b> ).                                                                                                     | S11 |

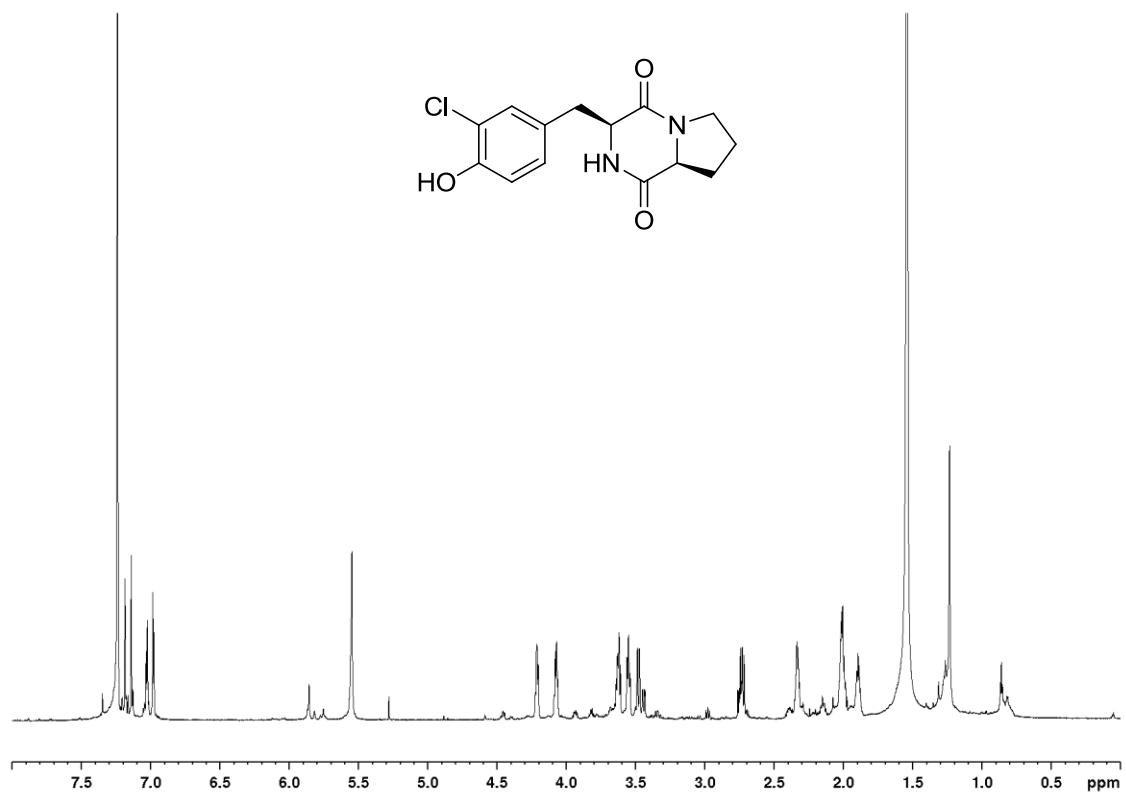

Figure S1. <sup>1</sup>H NMR spectrum of *cis*-cyclo(Pro-3-chloro-Tyr) (15) in CDCl<sub>3</sub>.

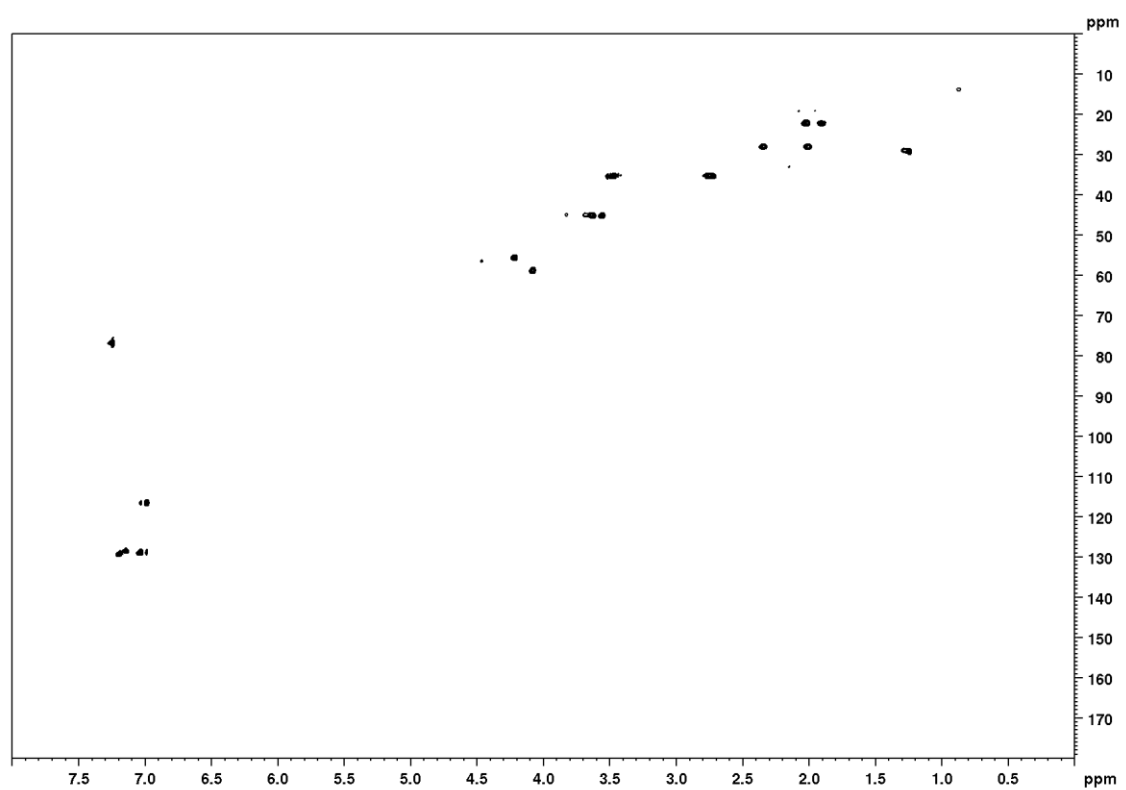

Figure S2. HSQC spectrum of *cis*-cyclo(Pro-3-chloro-Tyr) (15) in CDCl<sub>3</sub>.

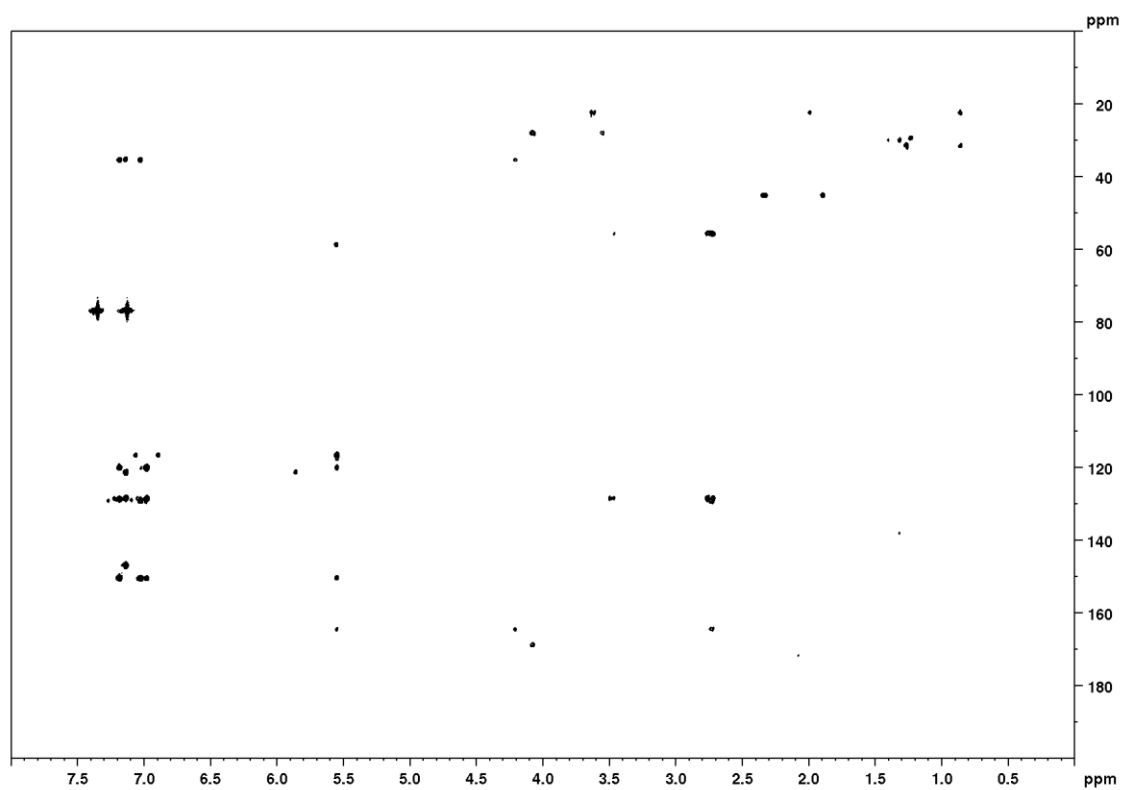

Figure S3. HMBC spectrum of *cis*-cyclo(Pro-3-chloro-Tyr) (**15**) in CDCl<sub>3</sub>.

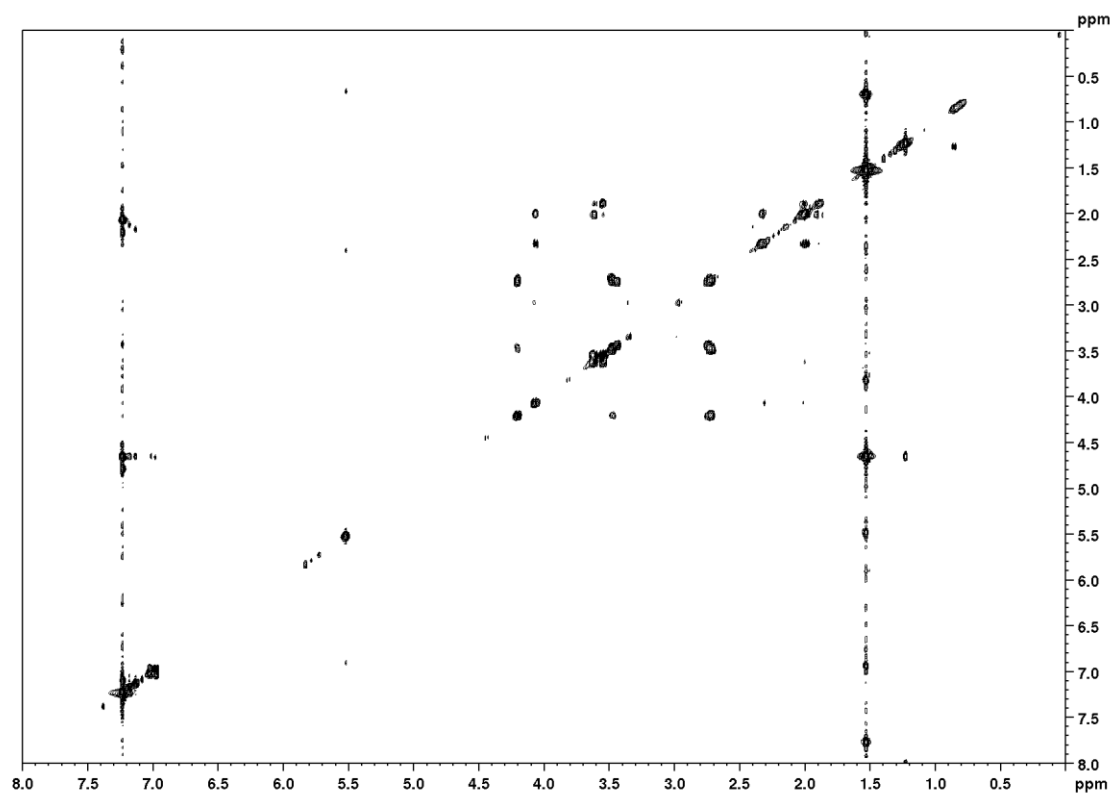

Figure S4. COSY spectrum of *cis*-cyclo(Pro-3-chloro-Tyr) (**15**) in CDCl<sub>3</sub>.

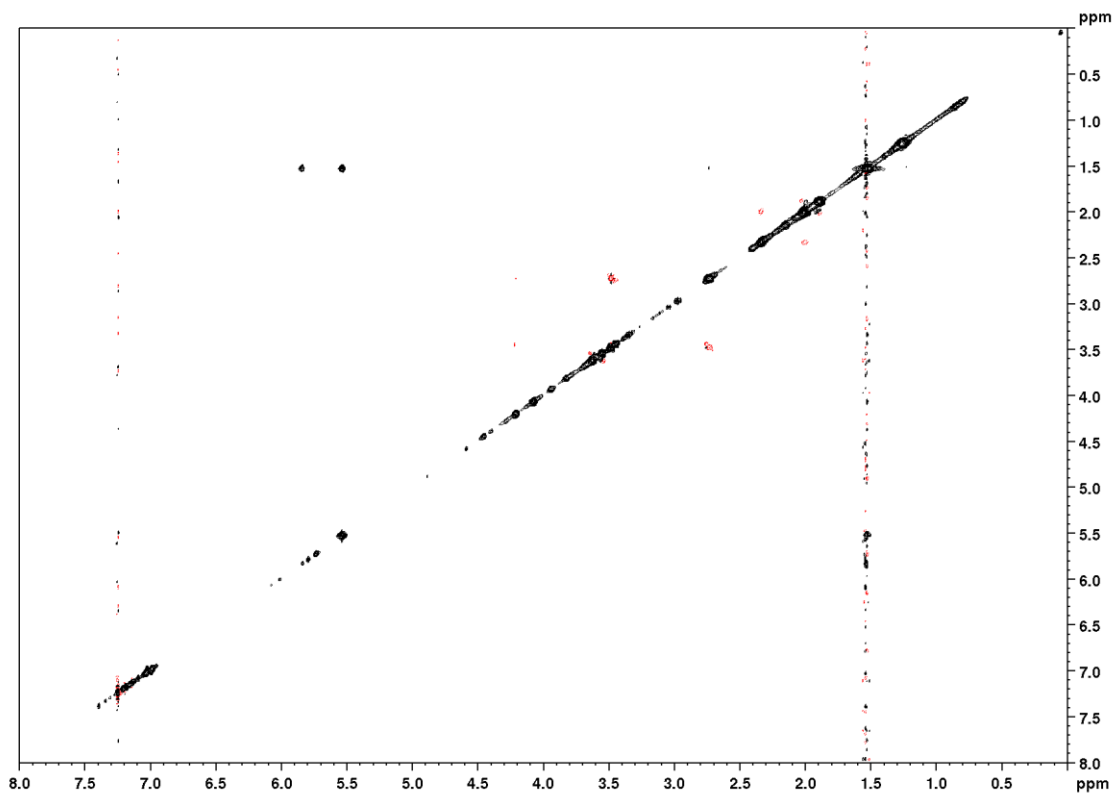

Figure S5. NOESY spectrum of *cis*-cyclo(Pro-3-chloro-Tyr) (**15**) in CDCl<sub>3</sub>.

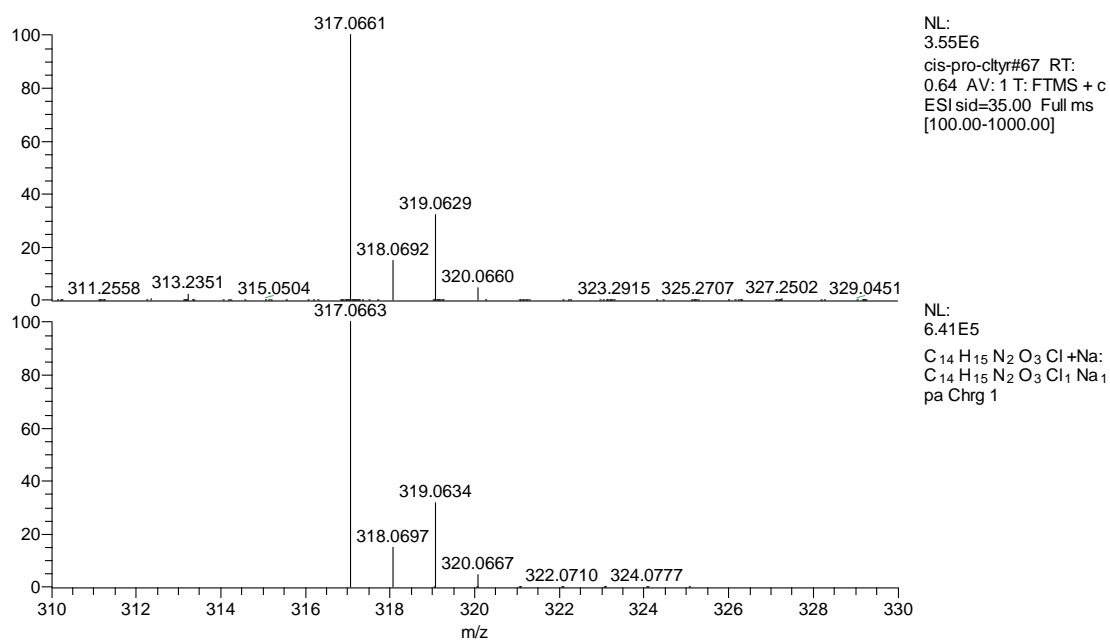

Figure S6. HRESIMS spectrum of *cis*-cyclo(Pro-3-chloro-Tyr) (**15**).

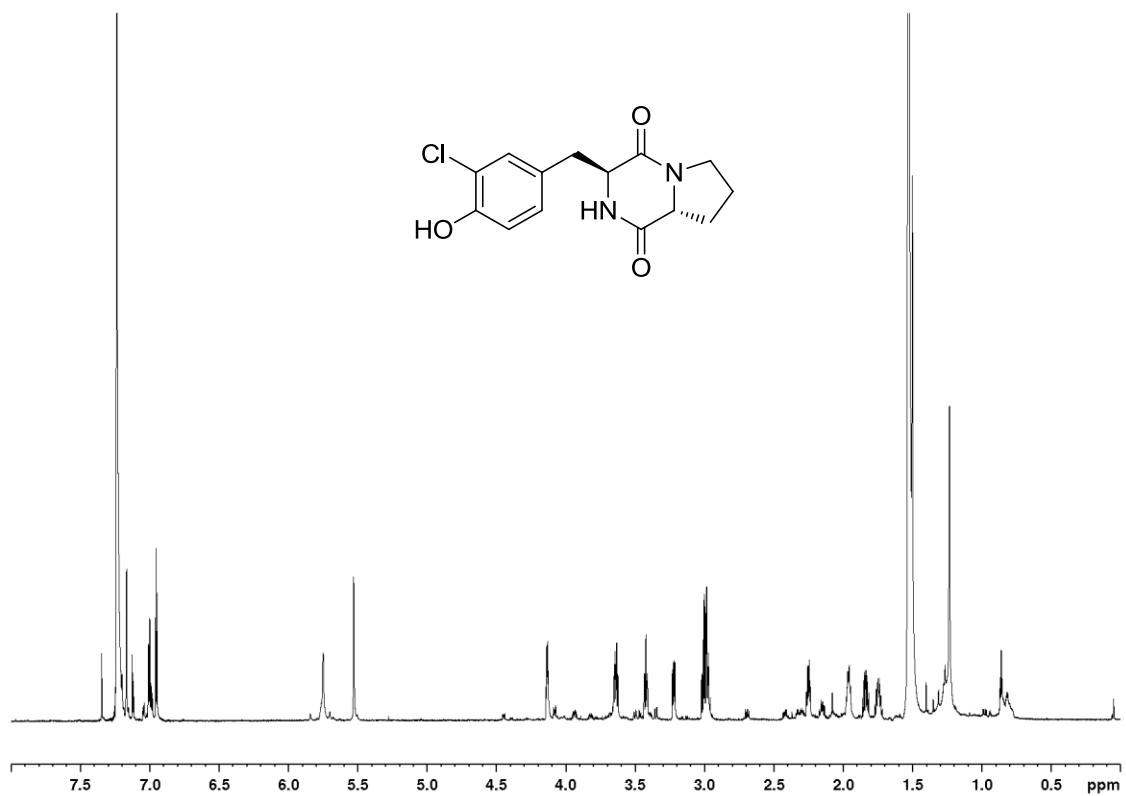

Figure S7. <sup>1</sup>H NMR spectrum of *trans*-cyclo(Pro-3-chloro-Tyr) (16) in CDCl<sub>3</sub>.

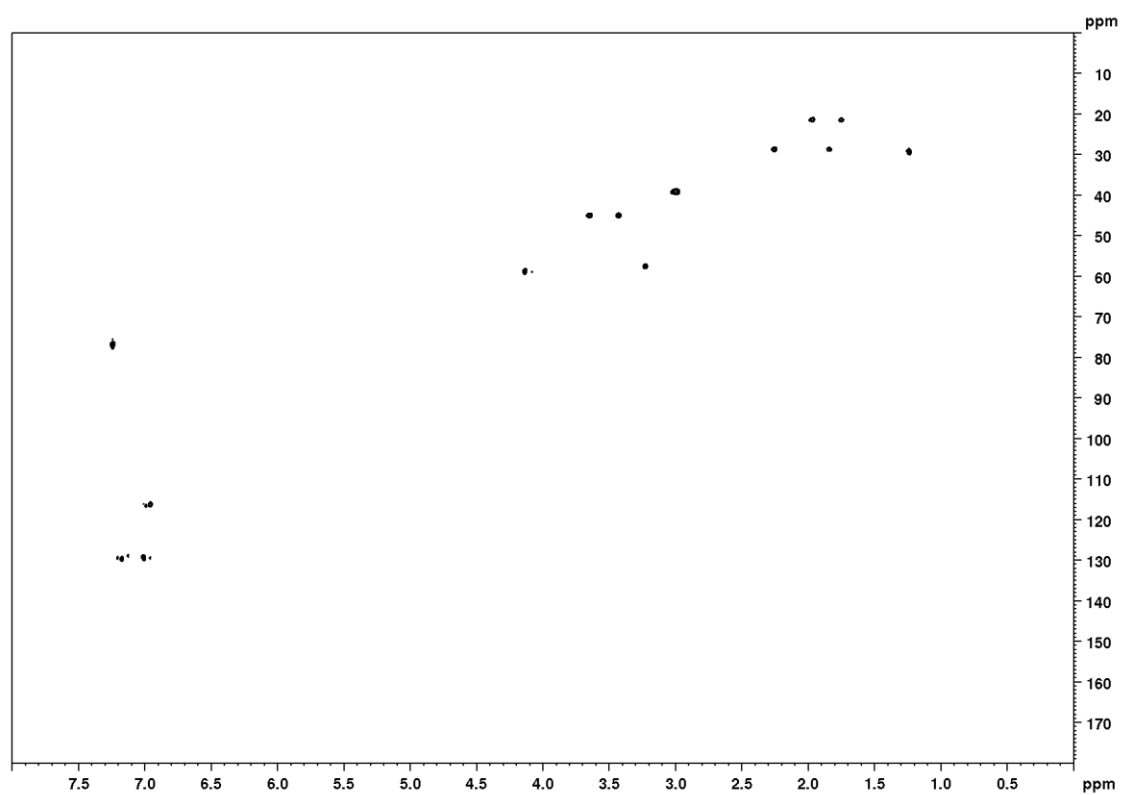

Figure S8. HSQC spectrum of *trans*-cyclo(Pro-3-chloro-Tyr) (16) in CDCl<sub>3</sub>.

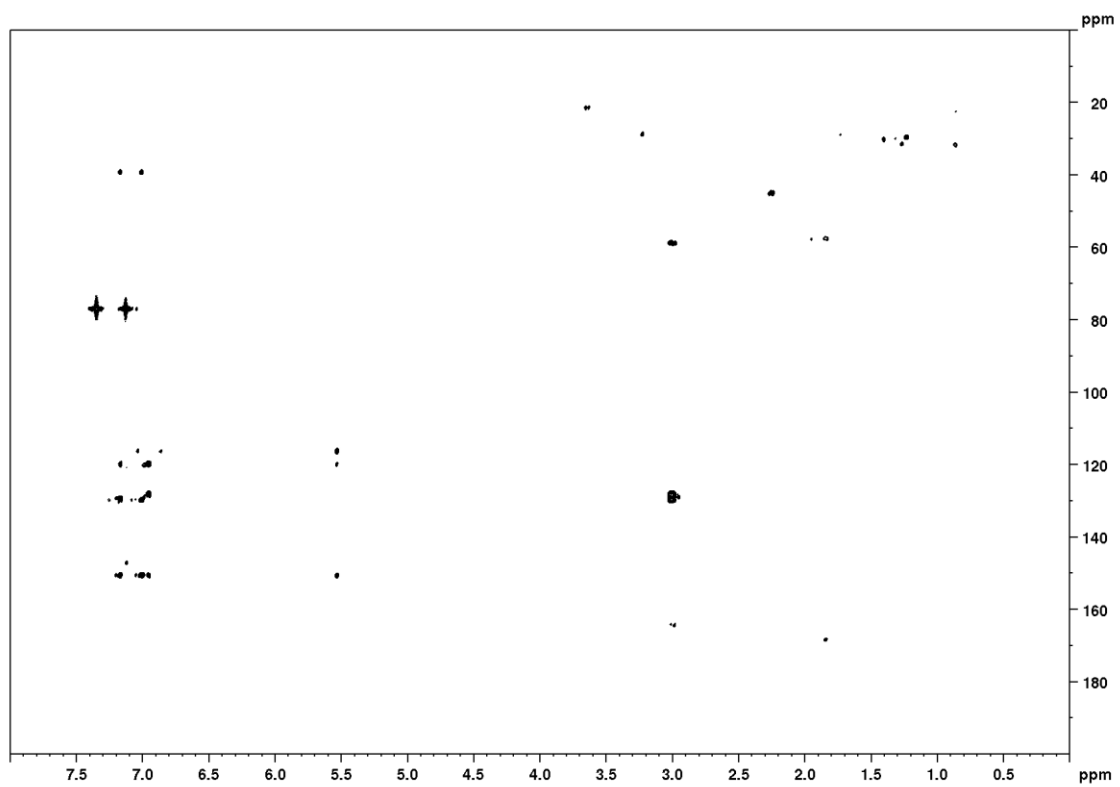

Figure S9. HMBC spectrum of *trans*-cyclo(Pro-3-chloro-Tyr) (**16**) in CDCl<sub>3</sub>.

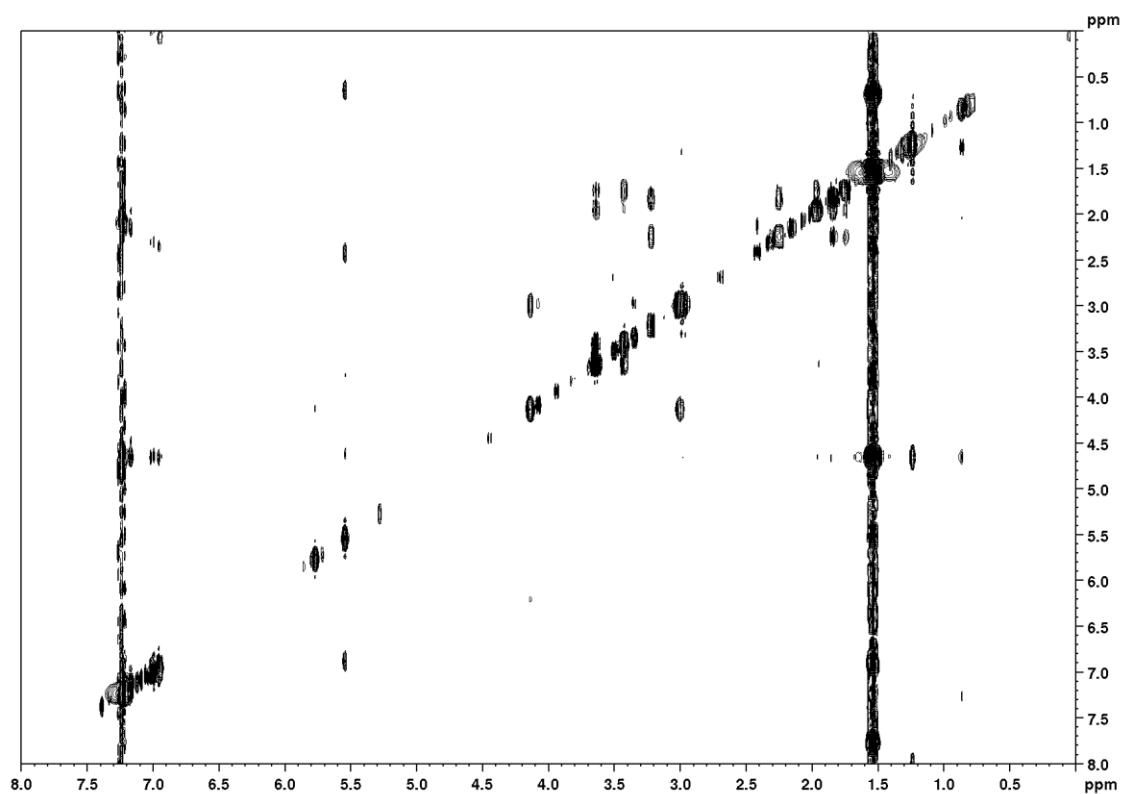

Figure S10. COSY spectrum of *trans*-cyclo(Pro-3-chloro-Tyr) (**16**) in CDCl<sub>3</sub>.

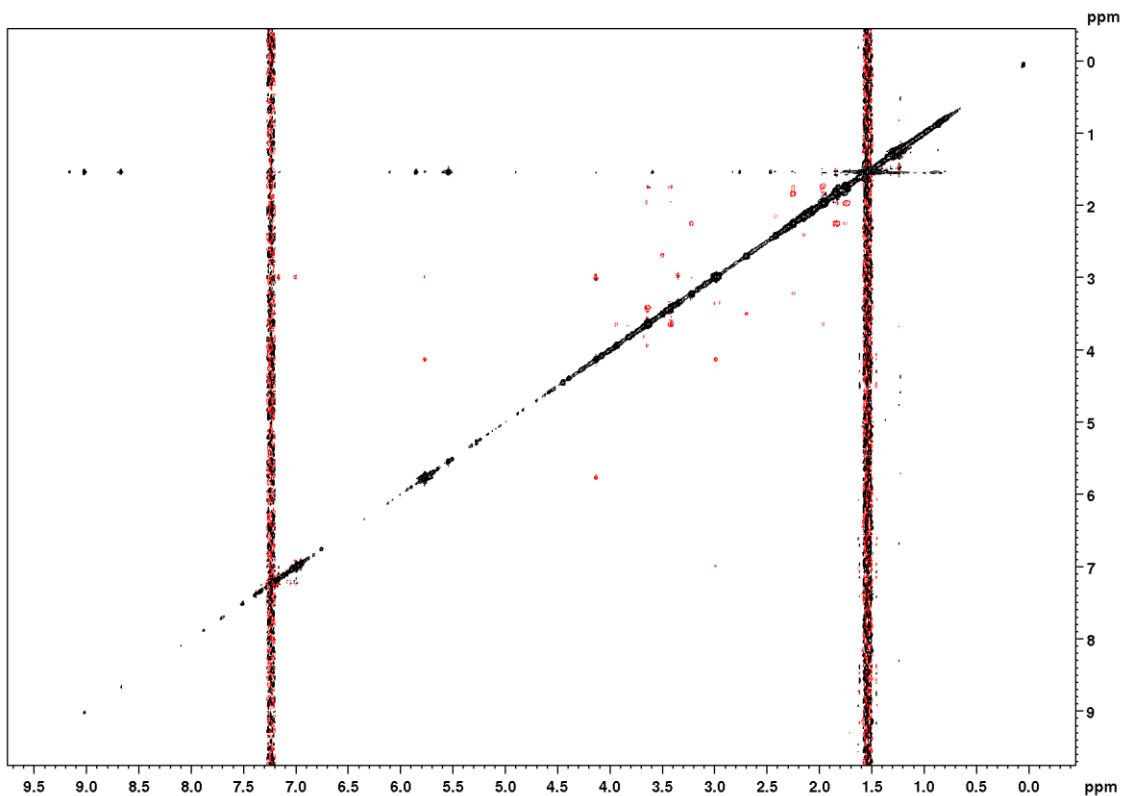

Figure S11. NOESY spectrum of *trans*-cyclo(Pro-3-chloro-Tyr) (**16**) in CDCl<sub>3</sub>.

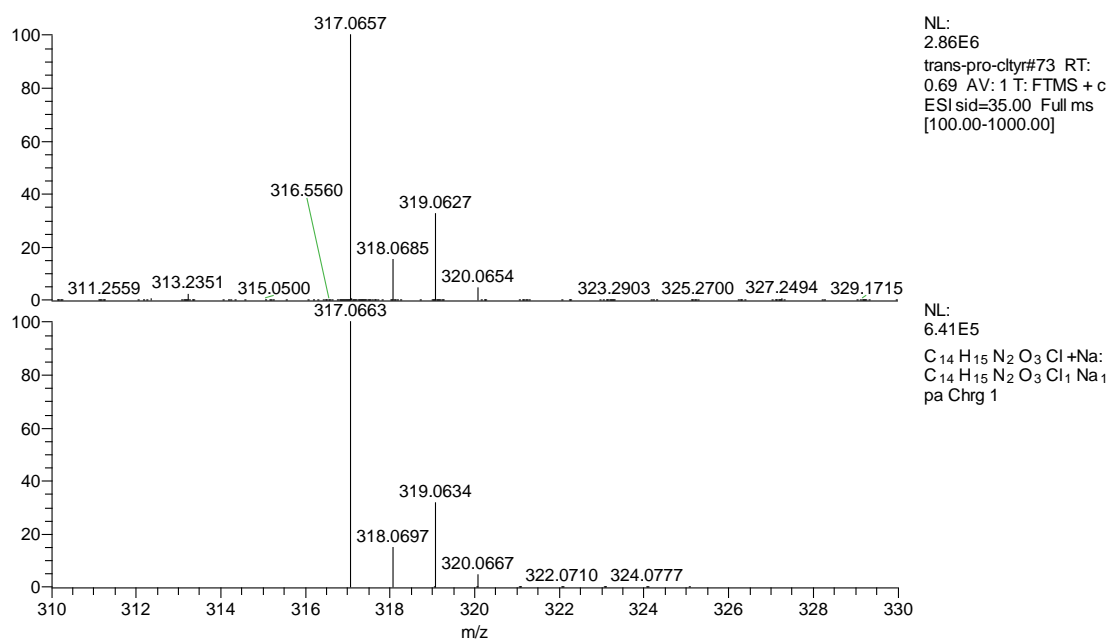

Figure S12. HRESIMS spectrum of *trans*-cyclo(Pro-3-chloro-Tyr) (**16**).



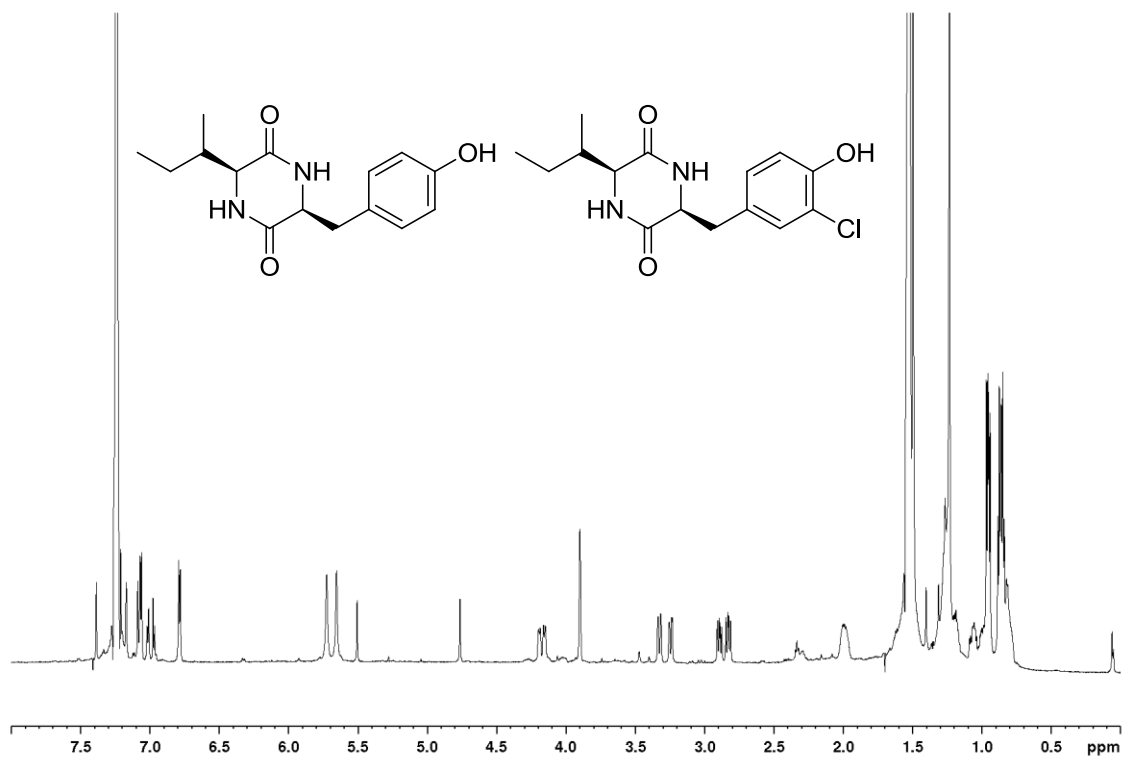

**Figure S13.** <sup>1</sup>H NMR spectrum of the 1:1 mixture of *cis*-cyclo(Tyr-Ile) (30) and *cis*-cyclo(3-chloro-Tyr-Ile) (31) in CDCl<sub>3</sub>.

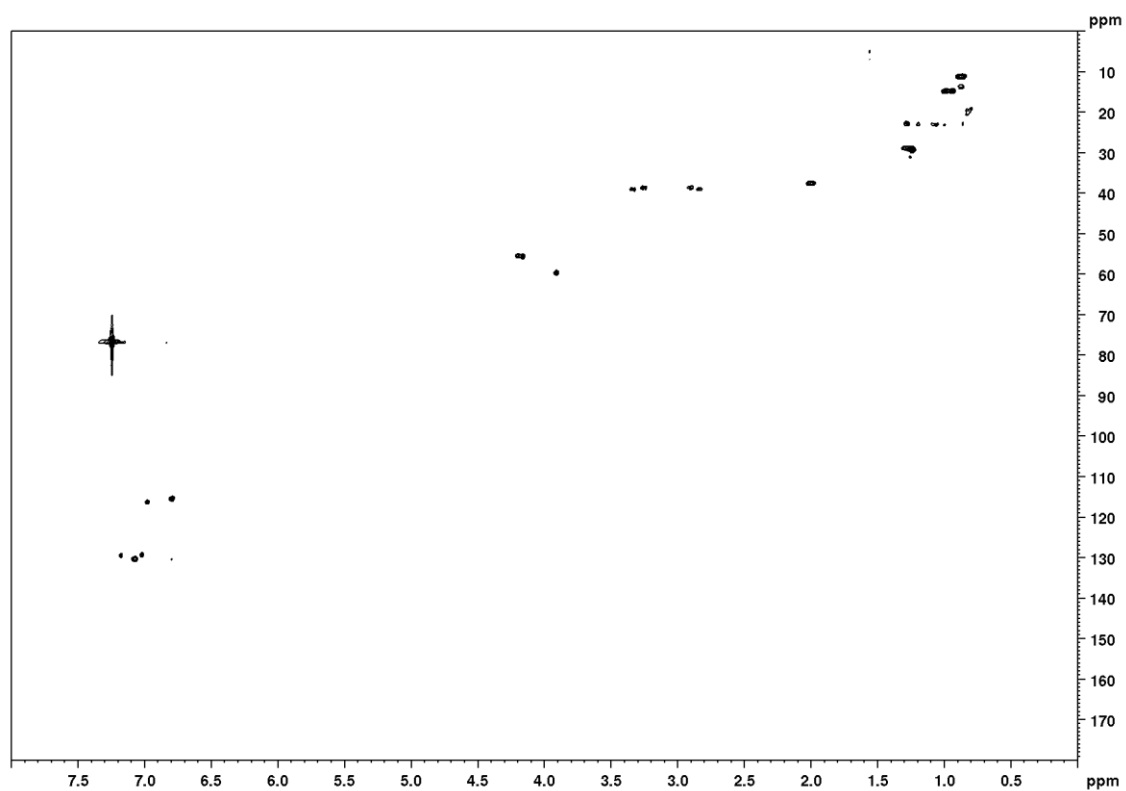

**Figure S14.** HSQC spectrum of the 1:1 mixture of *cis*-cyclo(Tyr-Ile) (30) and *cis*-cyclo(3-chloro-Tyr-Ile) (31) in CDCl<sub>3</sub>.

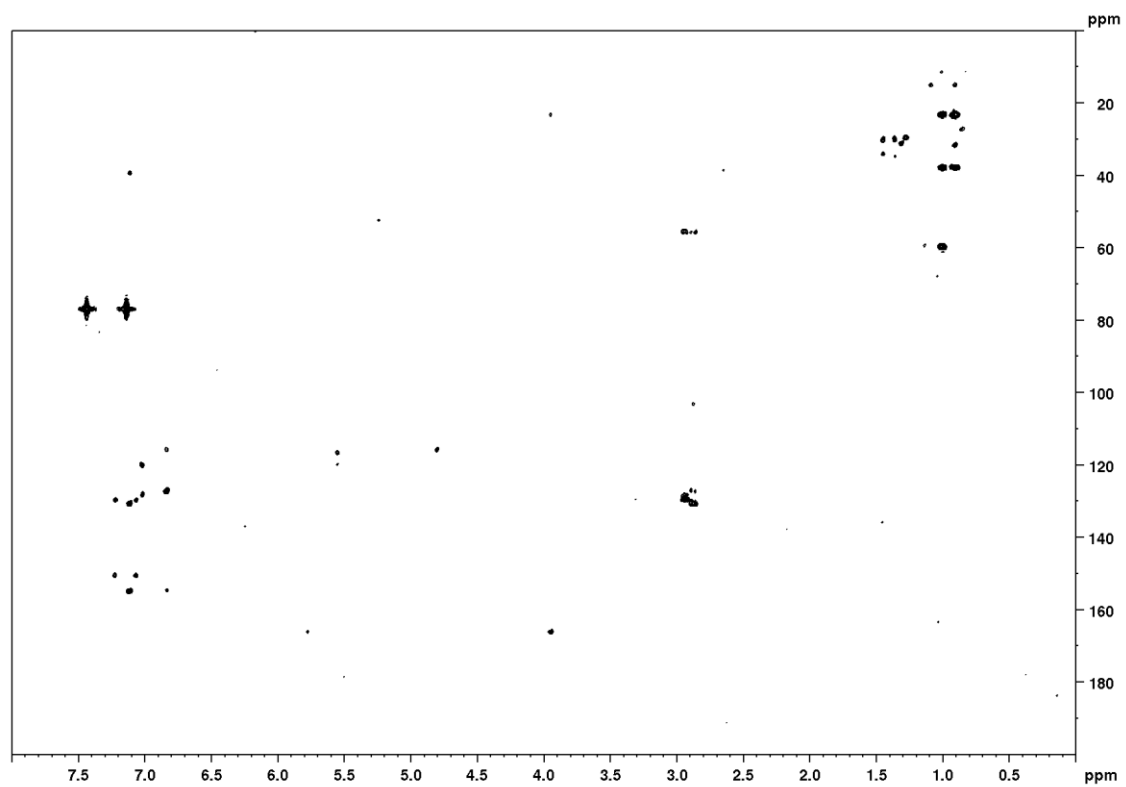

**Figure S15.** HMBC spectrum of the 1:1 mixture of *cis*-cyclo(Tyr-Ile) (**30**) and *cis*-cyclo(3-chloro-Tyr-Ile) (**31**) in CDCl<sub>3</sub>.

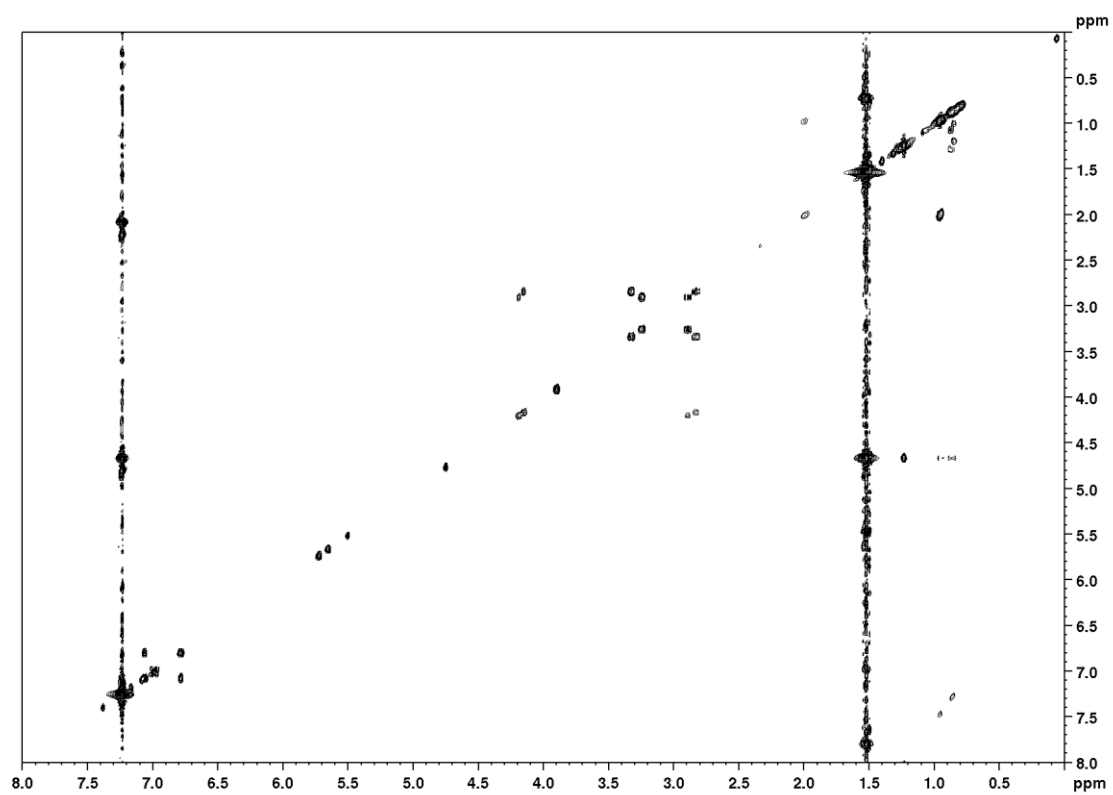

**Figure S16.** COSY spectrum of the 1:1 mixture of *cis*-cyclo(Tyr-Ile) (**30**) and *cis*-cyclo(3-chloro-Tyr-Ile) (**31**) in CDCl<sub>3</sub>.

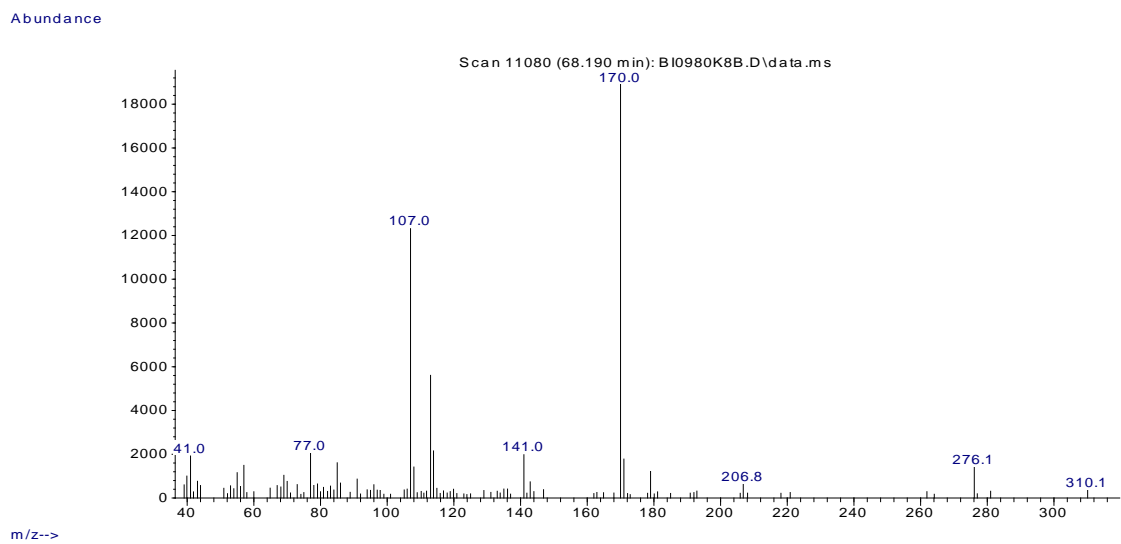

**Figure S17.** EIMS spectrum of *cis*-cyclo(3-chloro-Tyr-Ile) (**31**).
